# Supplementary material for: Stability and resilience of the intestinal microbiota in children in daycare – a 12 month cohort study
Source: PubMed Central journal article supplement (PMC6303881; doi:10.1186/s12866-018-1367-5), 2018-12-22

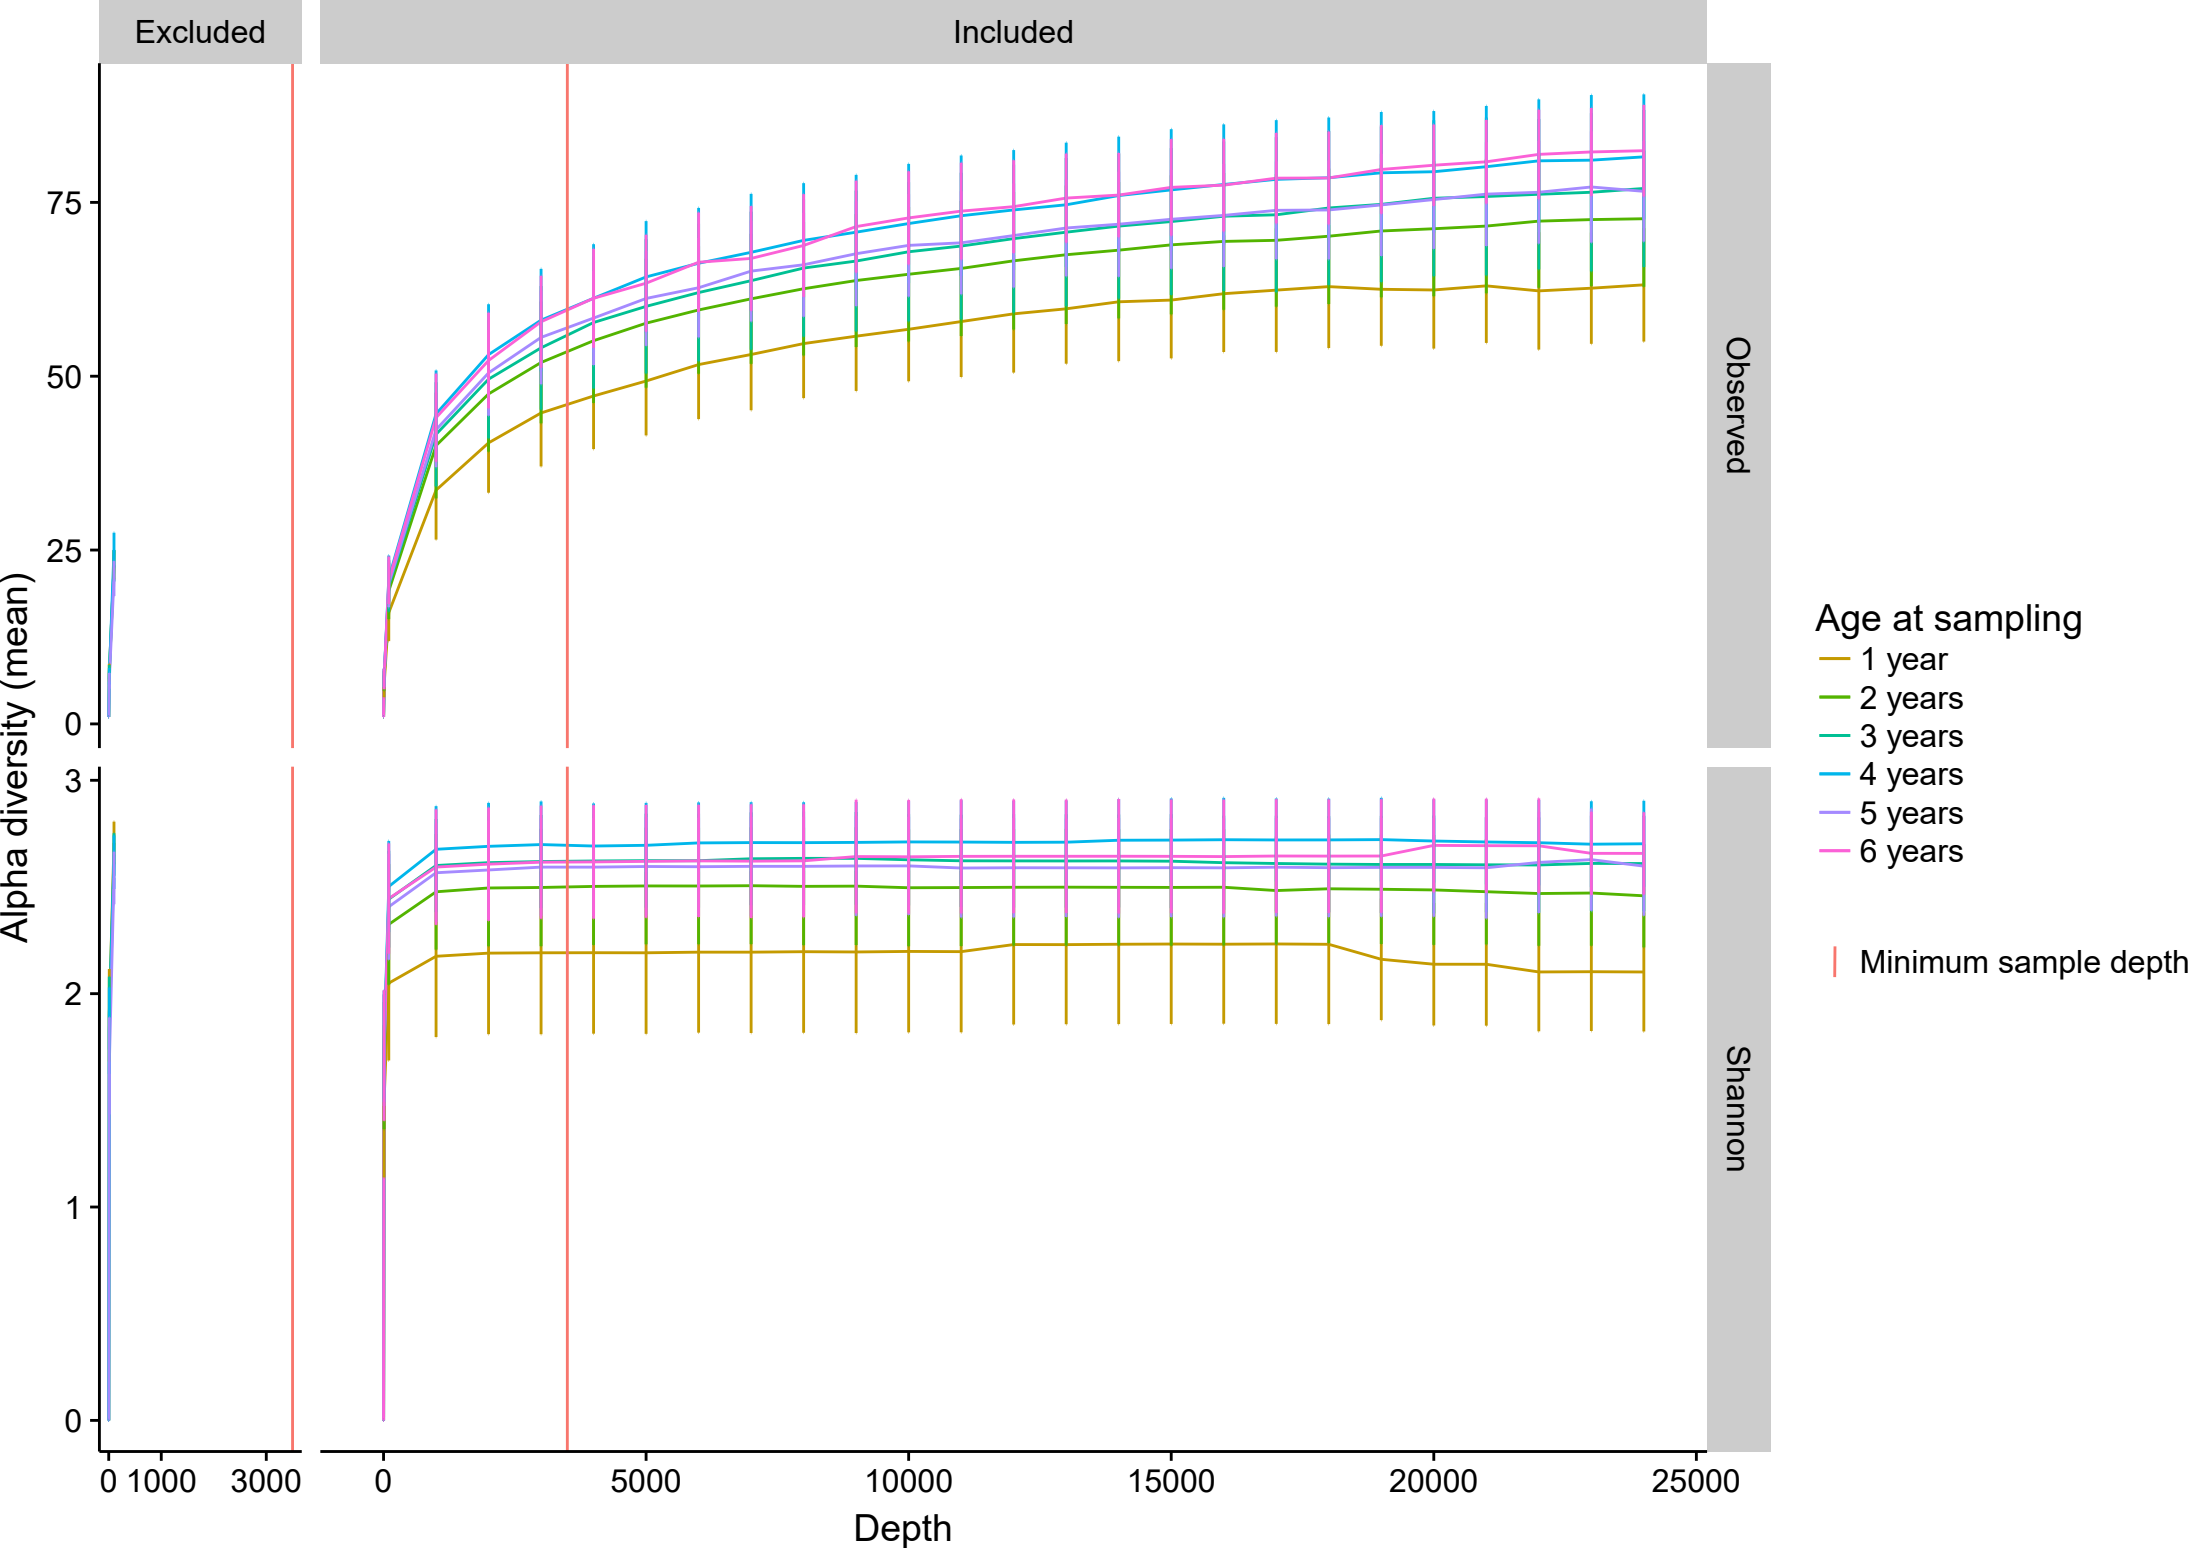

Supplement: 12866_2018_1367_MOESM2_ESM.pdf [file 12866_2018_1367_MOESM2_ESM.pdf]
